# Supplementary material for: Engineering metal sulfides with hierarchical interfaces for advanced sodium-ion storage systems
Source: Royal Society of Chemistry journal article supplement (doi:10.1039/c9ta13899d), 2020-01-01
Supplement: c9ta13899d1.pdf [file c9ta13899d1.pdf]

**Supporting Information:**

**Engineering Metal Sulfide with Hierarchical Interfaces towards  
Advanced Sodium-ions Storage**

**Wenqing Zhao,<sup>a</sup> Limin Zhang,<sup>a</sup> Feng Jiang,<sup>a</sup> Xinghua Chang,<sup>a</sup> Yue Yang,<sup>a</sup> Peng Ge,<sup>\*a</sup> Wei  
Sun,<sup>\*a</sup> and Xiaobo Ji<sup>b,c</sup>**

<sup>a</sup>School of Minerals Processing and Bioengineering, Central South University,  
Changsha 410083, Hunan, China

<sup>b</sup>College of Chemistry and Chemical Engineering, Central South University,  
Changsha 410083, Hunan, China

<sup>c</sup>State Key Laboratory of Powder Metallurgy, Central South University,  
Changsha 410083, Hunan, China.

\*Corresponding authors: Prof. Dr Peng Ge, Prof. Dr Wei Sun.

Tel: +86-731-88879616; Fax: +86-731-88879616

E-mail: [gp-gepeng@csu.edu.cn](mailto:gp-gepeng@csu.edu.cn), [sunmenghu@csu.edu.cn](mailto:sunmenghu@csu.edu.cn)

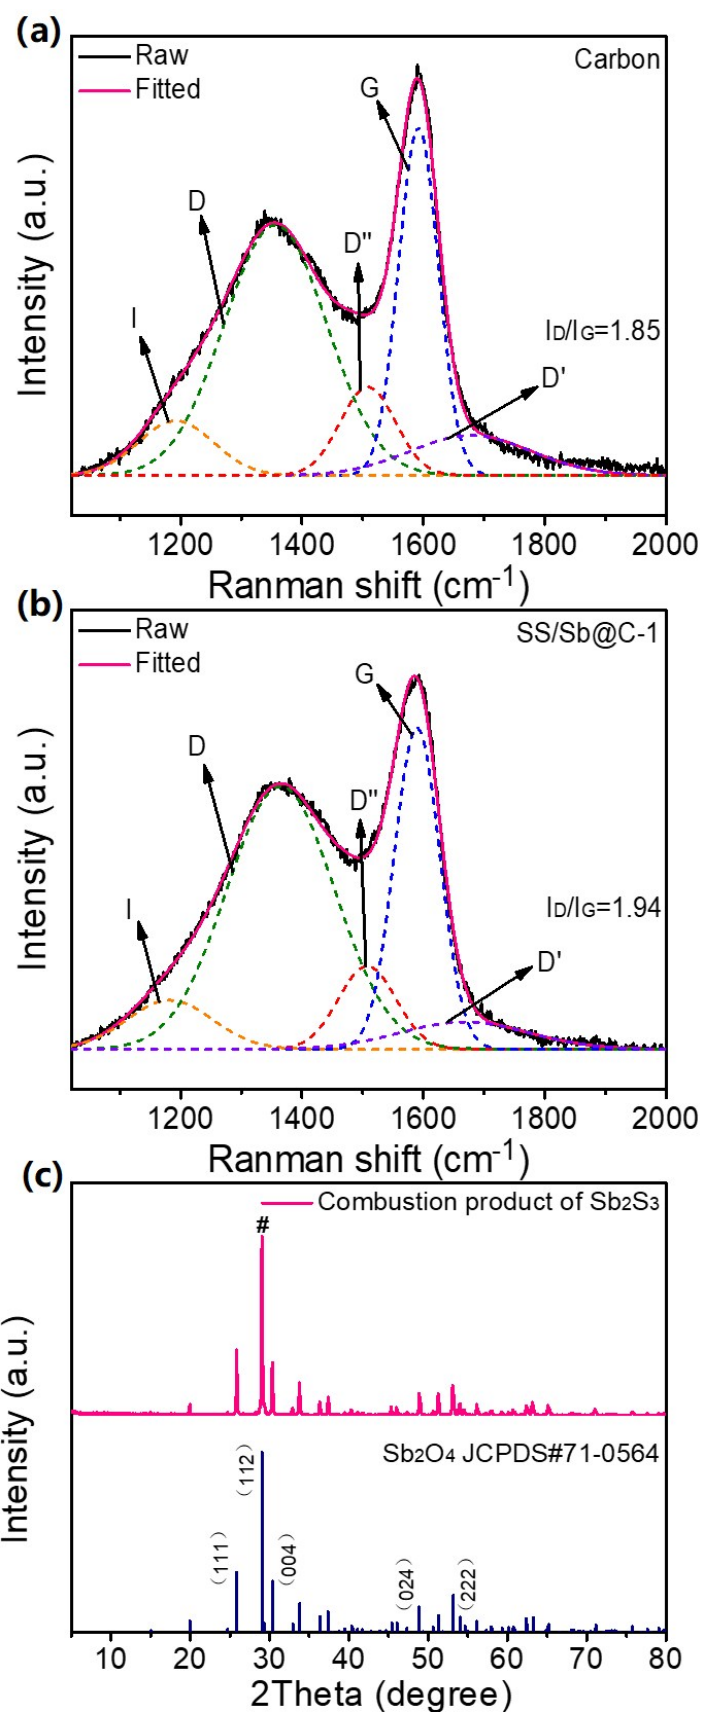

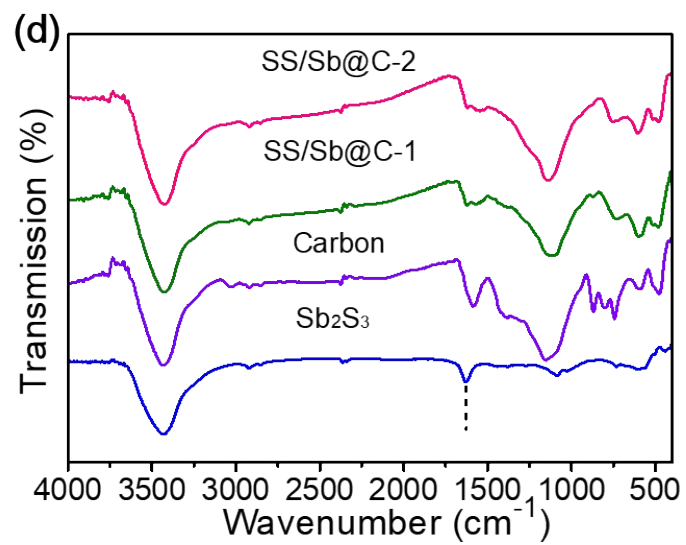

Fig. S1. Peak deconvolution of D-band and G-band for carbon (a) and SS/Sb@C-1 (b), XRD of combustion product at 800°C in air atmosphere (c), FTIR spectra from 400-2000cm<sup>-1</sup>.

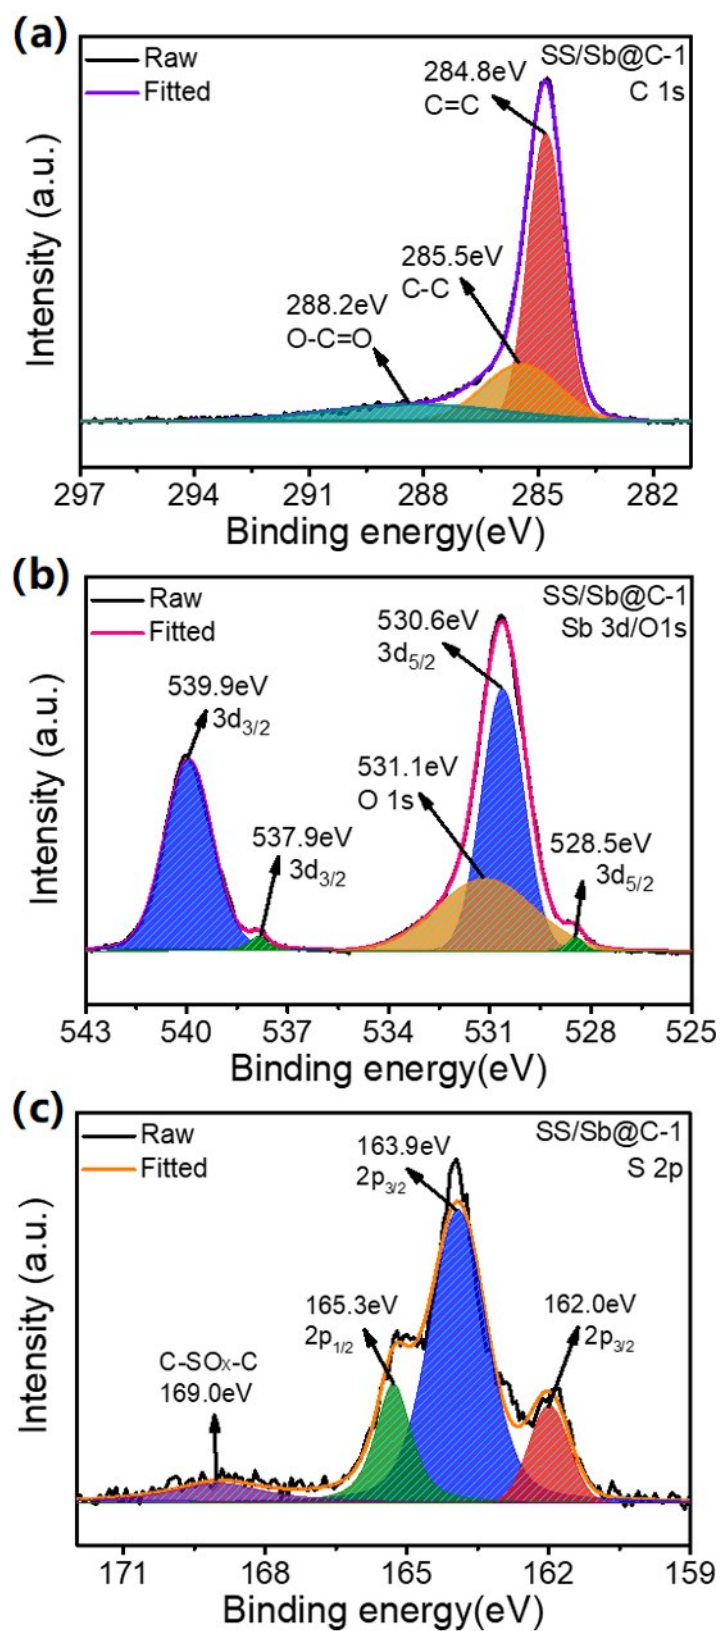

Fig. S2. High-resolution XPS spectra for SS/Sb@C-1 of C1s (a), Sb3d (b), S2p (c).

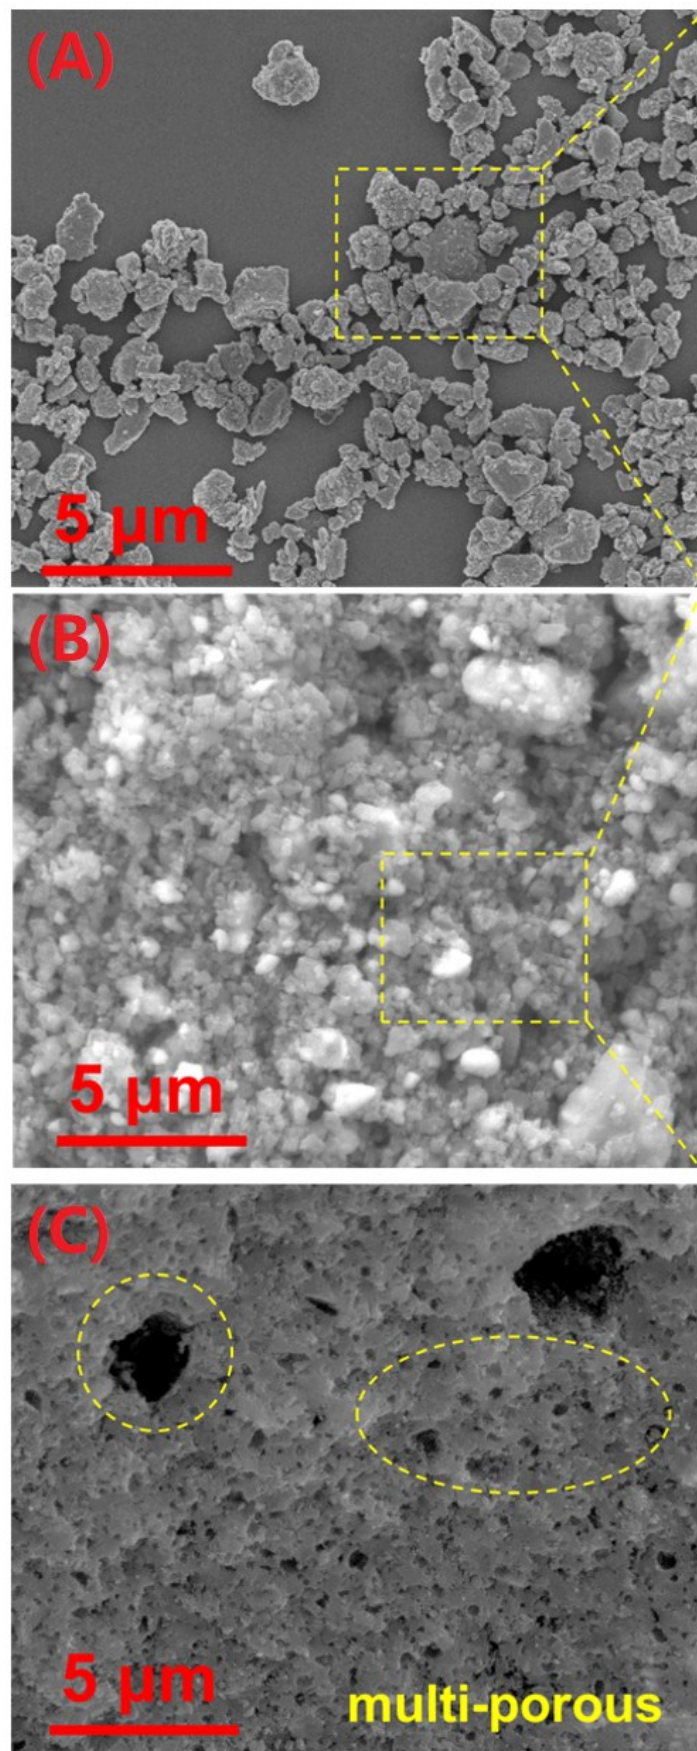

Fig. S3. SEM images of  $\text{Sb}_2\text{S}_3$  (A), SS/Sb@C-1 (B), SS/Sb@C-2 (C).



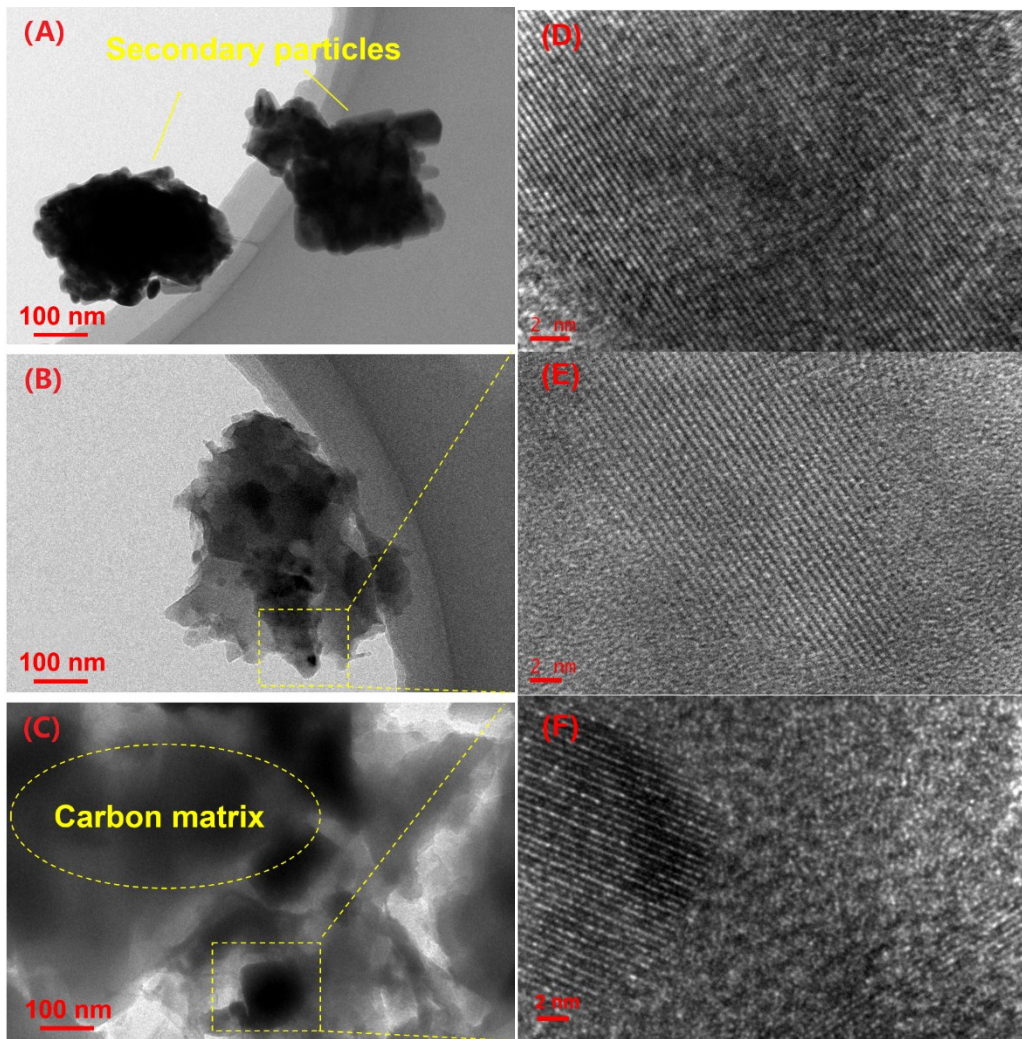

Fig. S4. TEM images of  $\text{Sb}_2\text{S}_3$  (A,D), SS/Sb@C-1 (B,E), SS/Sb@C-2 (C,F).

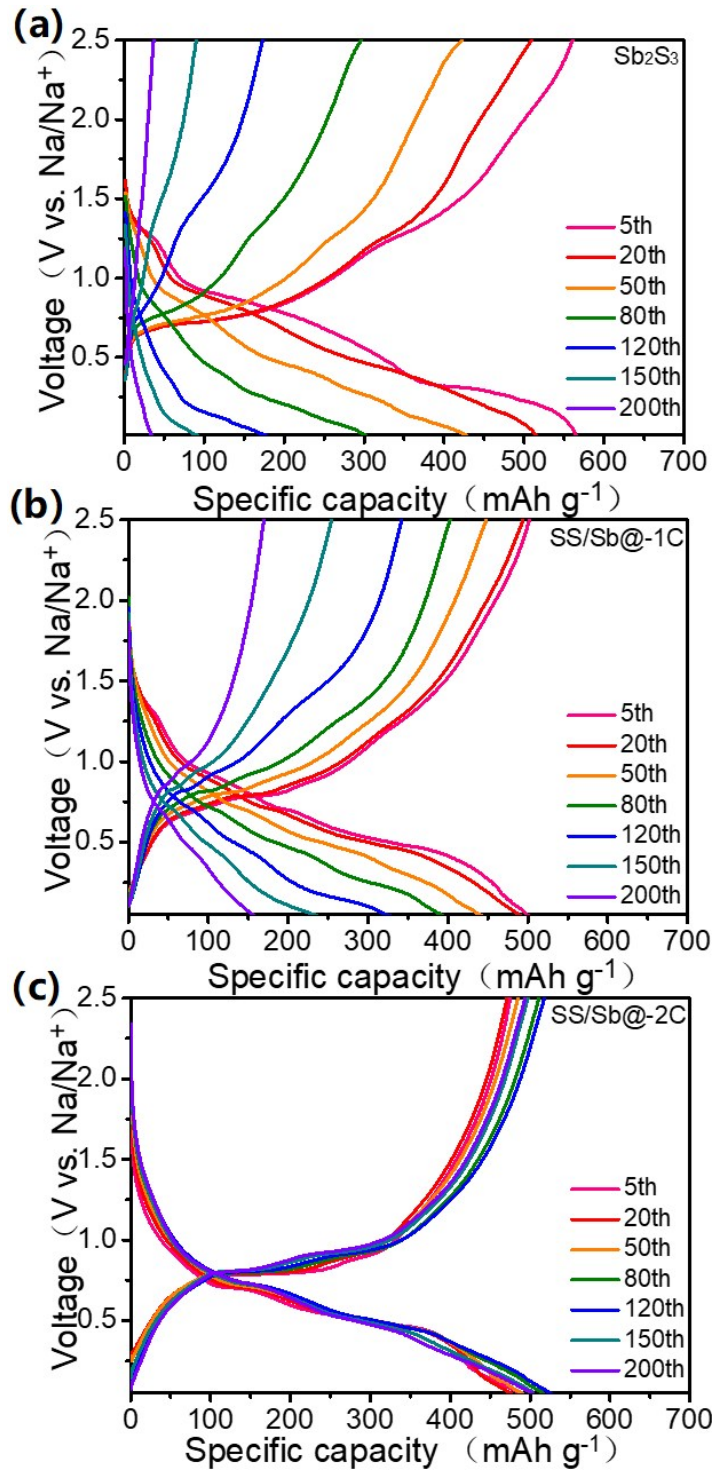

Fig. S5. Charge/discharge platforms at various cycles for Sb<sub>2</sub>S<sub>3</sub> (a), SS/Sb@C-1 (b), SS/Sb@C-2 (c).

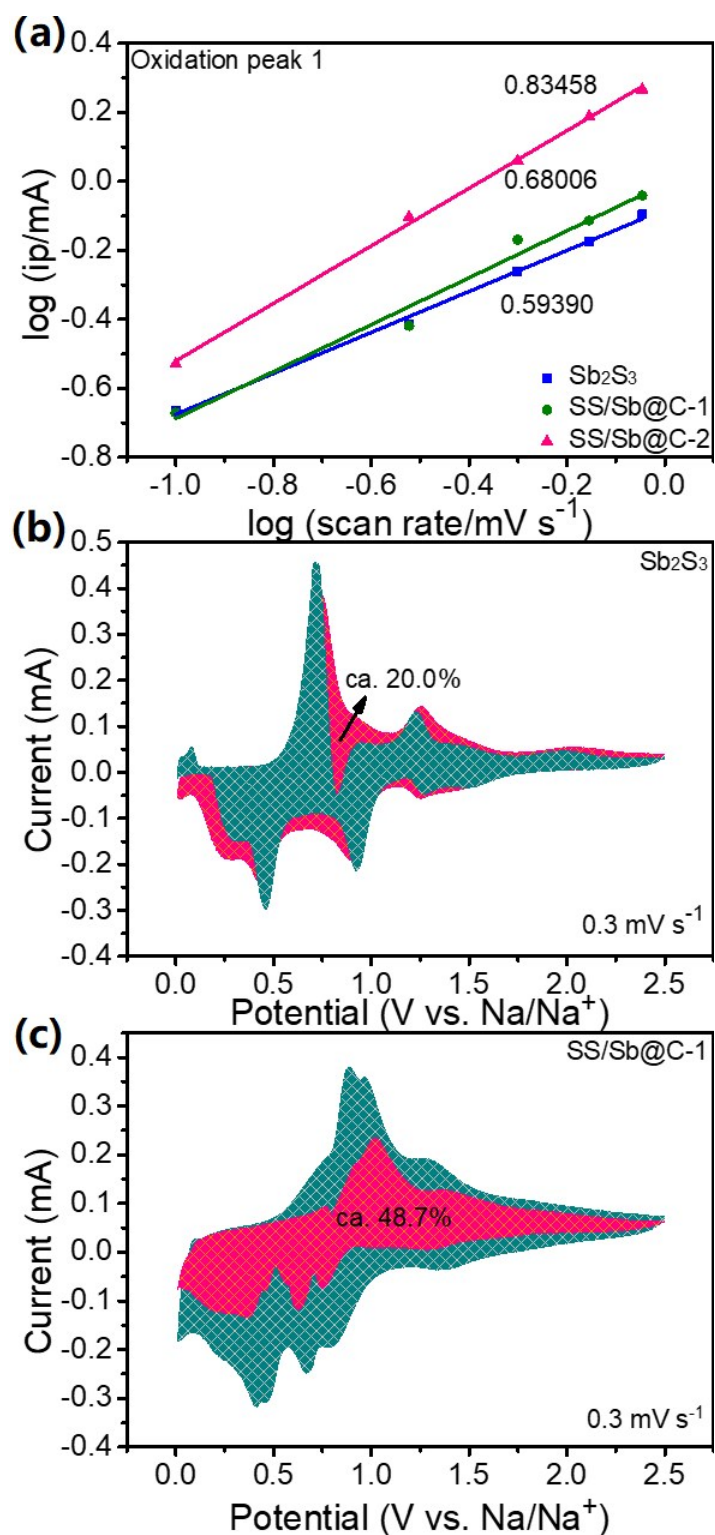

Fig. S6. Linear relation of  $\log(i)$  and  $\log(v)$  at peak 1 (D) (a), the capacitive contribution (in pink) and the diffusion contribution (in cyan) at  $0.3 mV s^{-1}$  of  $Sb_2S_3$  (b), SS/Sb@C-1 (c).



Table S1. Electrochemical reaction mechanism of SS/Sb@C-2.

| Process     |    | Chemical equation                                                                                              | Mechanism          |
|-------------|----|----------------------------------------------------------------------------------------------------------------|--------------------|
| Discharging | D1 | $\text{Sb}_2\text{S}_3 + x\text{Na}^+ + xe^- \rightarrow \text{Na}_x\text{Sb}_2\text{S}_3$                     | Intercalation      |
|             | D2 | $\text{Na}_x\text{Sb}_2\text{S}_3 + (6-x)\text{Na}^+ + (6-x)e^- \rightarrow 2\text{Sb} + 3\text{Na}_2\text{S}$ | Conversion         |
|             | D3 | $2\text{Sb} + 6\text{Na}^+ + 6e^- \rightarrow 2\text{Na}_3\text{Sb}$                                           | Alloying           |
| Charging    | C4 | $2\text{Na}_3\text{Sb} \rightarrow 2\text{Sb} + 6\text{Na}^+ + 6e^-$                                           | Dealloying         |
|             | C5 | $2\text{Sb} + 3\text{Na}_2\text{S} \rightarrow \text{Na}_x\text{Sb}_2\text{S}_3 + (6-x)\text{Na}^+ + (6-x)e^-$ | Inverse conversion |
|             | C6 | $\text{Na}_x\text{Sb}_2\text{S}_3 \rightarrow \text{Sb}_2\text{S}_3 + x\text{Na}^+ + xe^-$                     | Extraction         |

Table S2. Capacitive contribution of the as-prepared samples at various scan rates.

| Scan rate/ $\text{mV s}^{-1}$ | 0.1  | 0.3  | 0.5  | 0.7  | 0.9  |
|-------------------------------|------|------|------|------|------|
| $\text{Sb}_2\text{S}_3$       | 13.2 | 20.0 | 27.5 | 29.5 | 31.3 |
| SS/Sb@C-1                     | 41.4 | 48.7 | 59.8 | 63.6 | 65.5 |
| SS/Sb@C-2                     | 80.1 | 81.5 | 86.6 | 89.2 | 93.0 |

(Capacitive contribution, %)

Table S3. Value of  $R_{ct}$  for the target samples at different charge/discharge voltages.

| Voltage   | -1.0  | -0.4  | -0.01 | 0.6   | 1.5   | 2.5  |
|-----------|-------|-------|-------|-------|-------|------|
| $Sb_2S_3$ | 109.2 | 223.7 | 348.5 | 216.7 | 149.5 | 77.3 |
| SS/Sb@C-1 | 53.0  | 129.2 | 195.6 | 98.52 | 60.7  | 51.3 |
| SS/Sb@C-2 | 47.7  | 53.73 | 88.1  | 58.4  | 47.0  | 42.4 |

( $R_{ct}$ ,  $\Omega$ )
